# Supplementary material for: Cerebellar transcranial direct current stimulation for learning a novel split-belt treadmill task: a randomised controlled trial
Source: PubMed Central journal article supplement (PMC7366632; doi:10.1038/s41598-020-68825-2), 2020-07-16

Manuscript Title: Cerebellar transcranial direct current stimulation for learning a novel split-belt treadmill task: A randomised controlled trial.

Nitika Kumari, Denise Taylor, Usman Rashid, Alain C. Vandal, Paul F. Smith, and Nada Signal

Supplementary Figure S1: CONSORT study flow diagram.

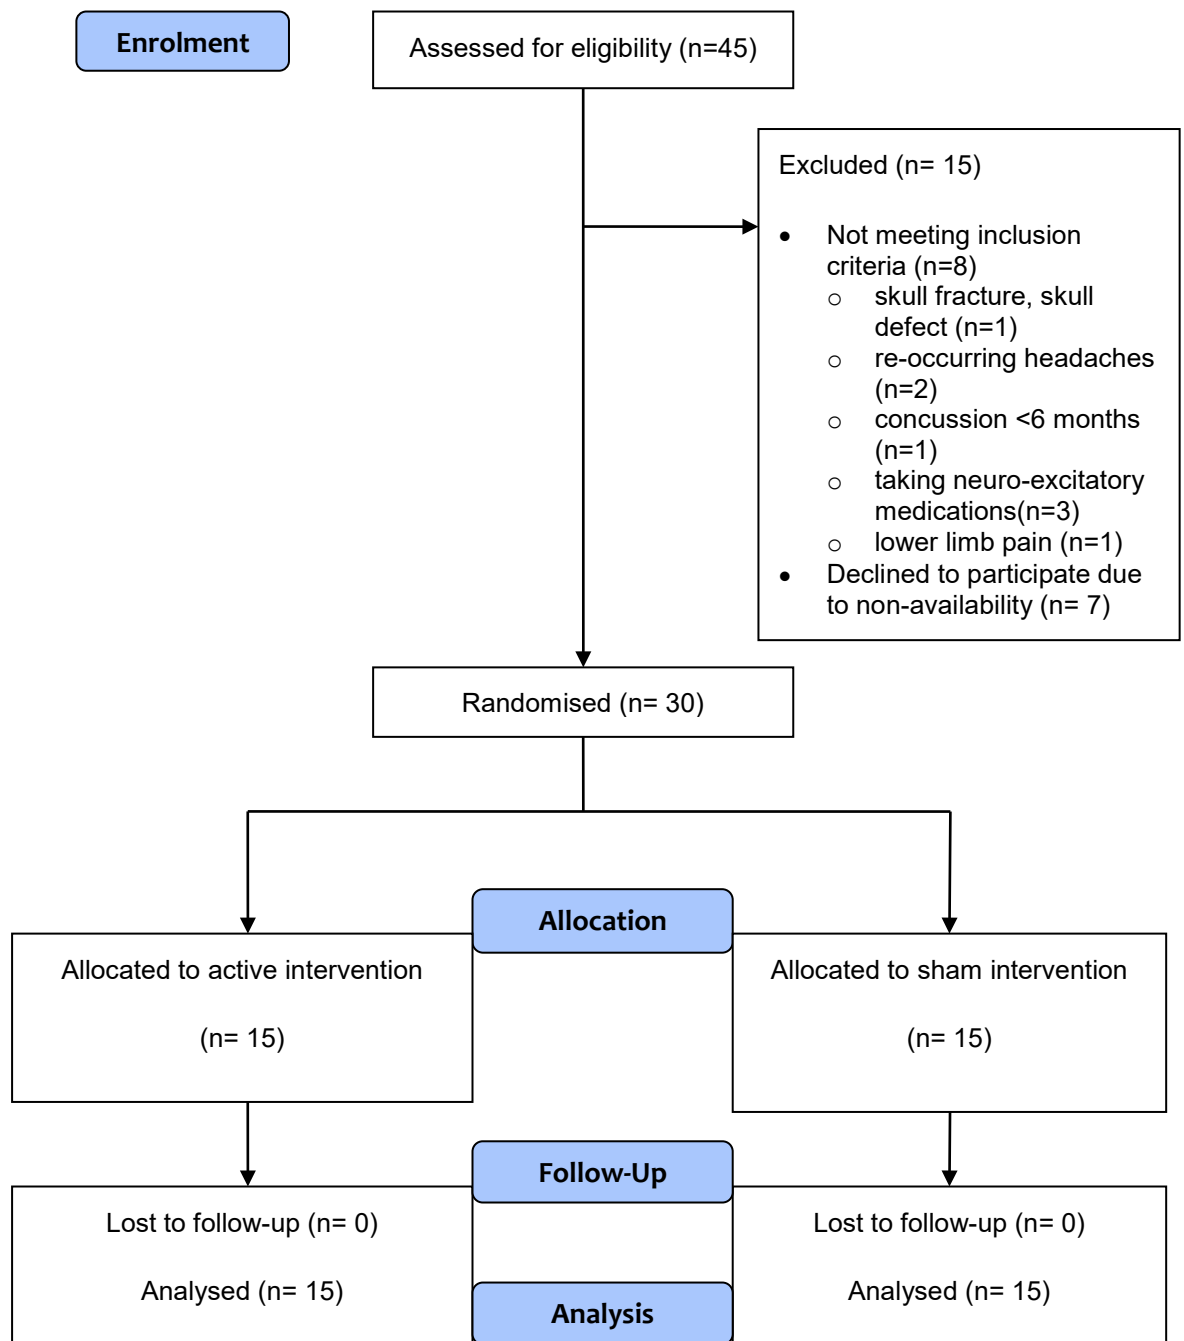

Manuscript Title: Cerebellar transcranial direct current stimulation for learning a novel split-belt treadmill task: A randomised controlled trial.

Nitika Kumari, Denise Taylor, Usman Rashid, Alain C. Vandal, Paul F. Smith, and Nada Signal

Supplementary Table S2: Baseline demographic characteristics.

|                                                          |           | Active ctDCS  | Sham ctDCS    |
|----------------------------------------------------------|-----------|---------------|---------------|
| N                                                        |           | 15            | 15            |
| Age (years)                                              | Mean (SD) | 31.4 (4.14)   | 29.8 (8.07)   |
|                                                          | Range     | 23-39         | 21-53         |
| Sex                                                      | Male      | 9             | 9             |
|                                                          | Female    | 6             | 6             |
| Height (cm)                                              | Mean (SD) | 172.66 (6.71) | 174.65 (8.74) |
|                                                          | Range     | 158.8-181.7   | 162.6-193.5   |
| Weight (Kg)                                              | Mean (SD) | 73.81 (11.88) | 76.81 (19.21) |
|                                                          | Range     | 57.3-92.5     | 53.8-124.5    |
| Leg Dominance                                            | Right     | 14            | 14            |
|                                                          | Left      | 1             | 1             |
| Fastest comfortable walking speed/ Fast belt speed (m/s) | Mean (SD) | 1.60 (0.29)   | 1.61 (0.26)   |
|                                                          | Range     | 1.10-2.10     | 1.10-2.10     |

Manuscript Title: Cerebellar transcranial direct current stimulation for learning a novel split-belt treadmill task: A randomised controlled trial.

Nitika Kumari, Denise Taylor, Usman Rashid, Alain C. Vandal, Paul F. Smith, and Nada Signal

Supplementary Figure S3: Contrast estimates based on marginal means for the adaptation phase and de-adaptation phase treatment effects with the 95% confidence interval estimated from the statistical models. Units are in ratio for strides to steady-state; for example, a ratio effect size of 1.592 means that the experimental group has a 59 percent higher mean value compared to the control group for strides to state-state performance.

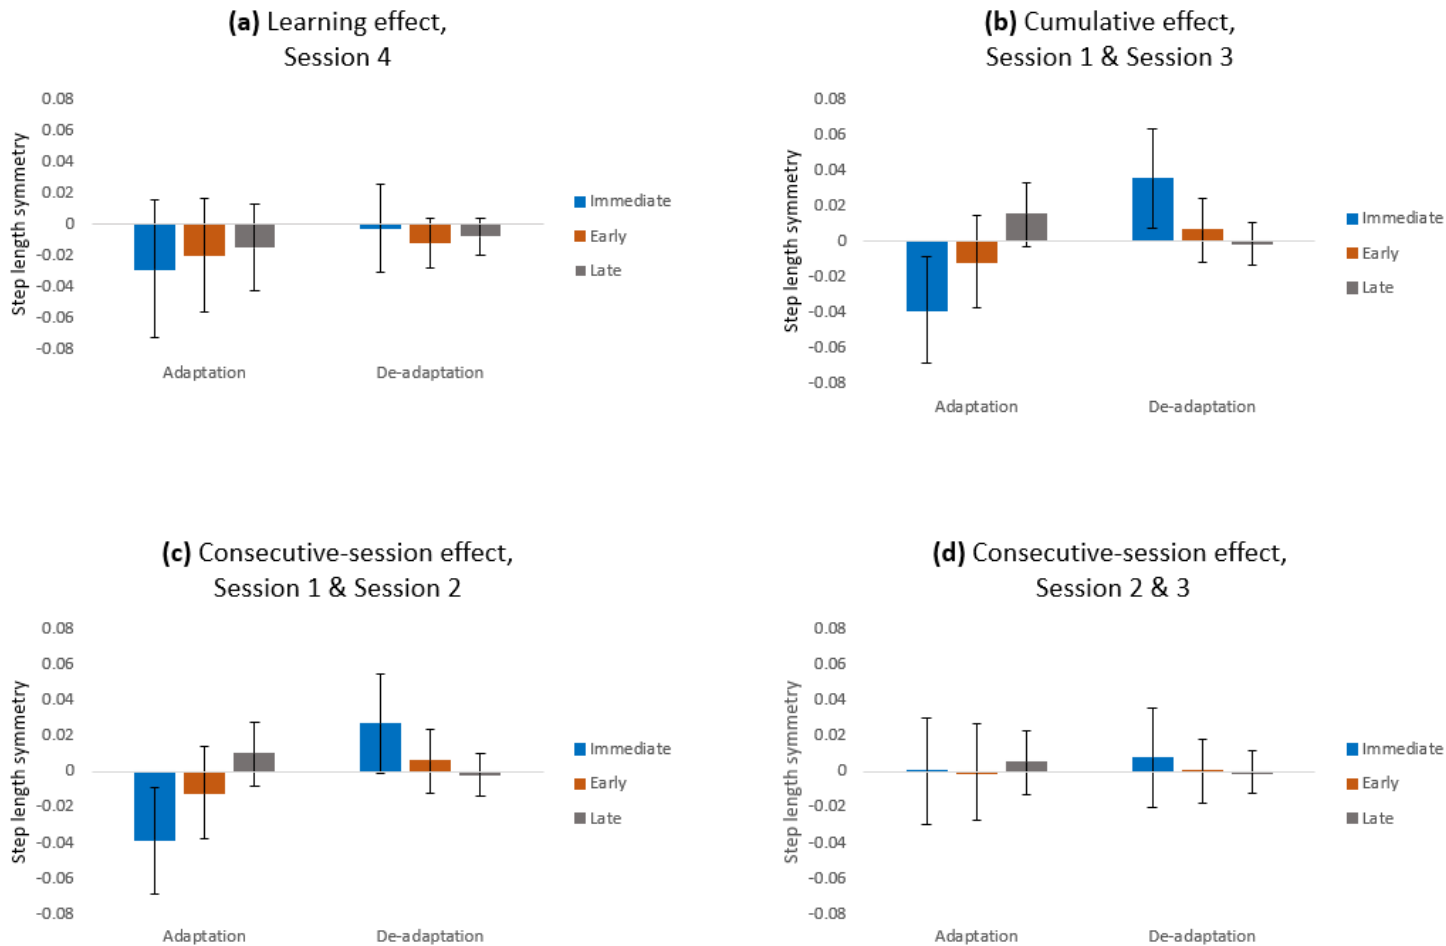

**(e) Session-specific effect, Session 1**

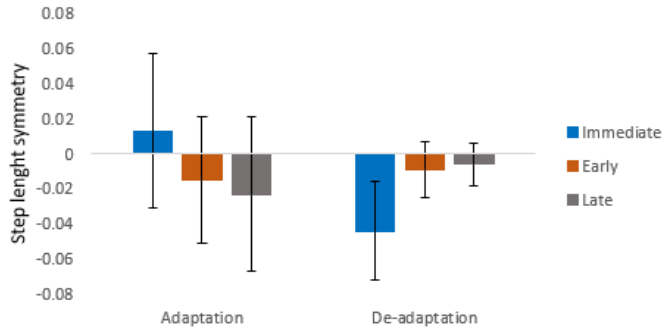

**(f) Session-specific effect, Session 2**

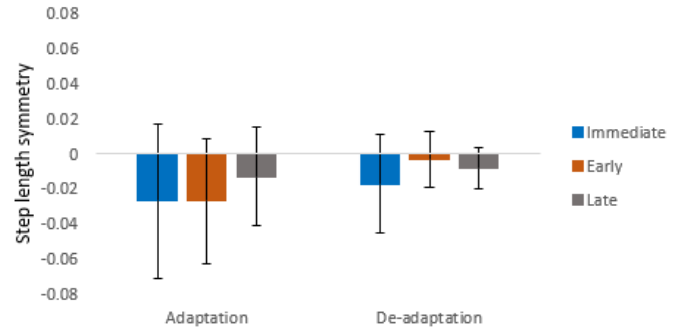

**(g) Session-specific effect, Session 3**

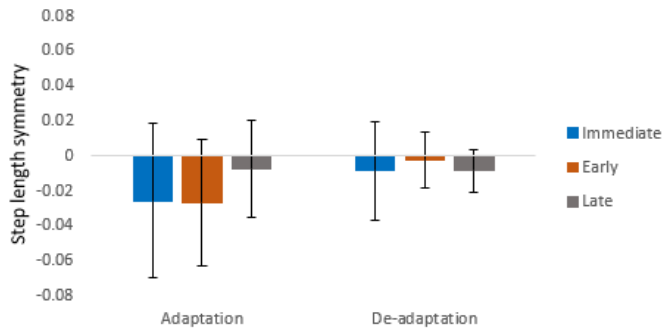

**(h) Strides to steady-state**

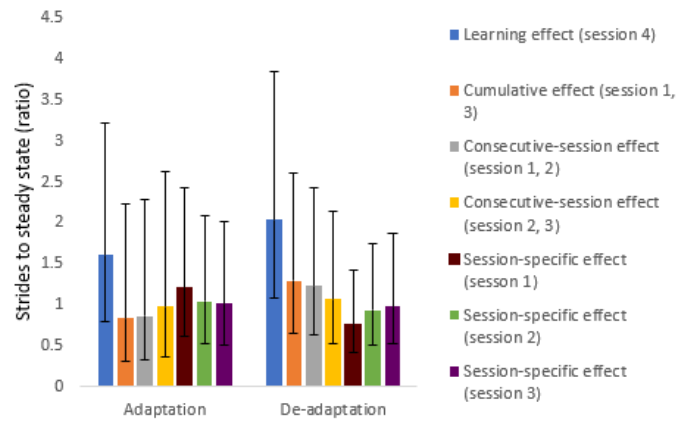

Supplement: 41598_2020_68825_MOESM1_ESM.pdf [file 41598_2020_68825_MOESM1_ESM.pdf]
